# Supplementary material for: High-Frequency Variation of Purine Biosynthesis Genes Is a Mechanism of Success in Campylobacter jejuni
Source: PubMed Central journal article supplement — mBio. 2015 Sep 29;6(5):e00612-15. doi: 10.1128/mBio.00612-15 (PMC4611032; doi:10.1128/mbio.00612-15), 2015-09-29
Supplement: mbo005152478sf2.pdf [file mbo005152478sf2.pdf]

| Predicted protein sequence alignment of <i>purF</i> from 96 single colony isolates | 10 |   |   |   |   |   |   |   |   |    | 20 |    |    |    |    |    |    |    |    |    | 30 |    |    |    |    |    |    |    |    |    | 40 |    |    |    |    |    |    |    |    |    | 50 |    |    |    |    |    |    |    |    |    | 60 |    |    |    |    |    |    |    |    |    | 70 |    |    |    |    |    |    |    |    |    | 80 |    |    |    |    |    |    |    |    |    | 90 |    |    |    |    |    |    |    |    |    | 100 |    |    |    |    |    |    |    |    |     | 110 |     |     |     |     |     |     |     |     |     | 120 |     |     |     |     |     |     |     |     |     | 130 |     |     |     |     |     |     |     |     |     | 140 |     |     |     |     |     |     |     |     |     | 150 |     |     |     |     |     |     |     |     |     | 160 |     |     |     |     |     |     |     |     |     | 170 |     |     |     |     |     |     |     |     |     | 180 |     |     |     |     |     |     |     |     |     | 190 |     |     |     |     |     |     |     |     |     | 200 |     |     |     |     |     |     |     |     |     |
|------------------------------------------------------------------------------------|----|---|---|---|---|---|---|---|---|----|----|----|----|----|----|----|----|----|----|----|----|----|----|----|----|----|----|----|----|----|----|----|----|----|----|----|----|----|----|----|----|----|----|----|----|----|----|----|----|----|----|----|----|----|----|----|----|----|----|----|----|----|----|----|----|----|----|----|----|----|----|----|----|----|----|----|----|----|----|----|----|----|----|----|----|----|----|----|----|----|-----|----|----|----|----|----|----|----|----|-----|-----|-----|-----|-----|-----|-----|-----|-----|-----|-----|-----|-----|-----|-----|-----|-----|-----|-----|-----|-----|-----|-----|-----|-----|-----|-----|-----|-----|-----|-----|-----|-----|-----|-----|-----|-----|-----|-----|-----|-----|-----|-----|-----|-----|-----|-----|-----|-----|-----|-----|-----|-----|-----|-----|-----|-----|-----|-----|-----|-----|-----|-----|-----|-----|-----|-----|-----|-----|-----|-----|-----|-----|-----|-----|-----|-----|-----|-----|-----|-----|-----|-----|-----|-----|-----|-----|-----|-----|-----|-----|-----|-----|-----|-----|-----|-----|-----|-----|-----|-----|
|                                                                                    | 1  | 2 | 3 | 4 | 5 | 6 | 7 | 8 | 9 | 10 | 11 | 12 | 13 | 14 | 15 | 16 | 17 | 18 | 19 | 20 | 21 | 22 | 23 | 24 | 25 | 26 | 27 | 28 | 29 | 30 | 31 | 32 | 33 | 34 | 35 | 36 | 37 | 38 | 39 | 40 | 41 | 42 | 43 | 44 | 45 | 46 | 47 | 48 | 49 | 50 | 51 | 52 | 53 | 54 | 55 | 56 | 57 | 58 | 59 | 60 | 61 | 62 | 63 | 64 | 65 | 66 | 67 | 68 | 69 | 70 | 71 | 72 | 73 | 74 | 75 | 76 | 77 | 78 | 79 | 80 | 81 | 82 | 83 | 84 | 85 | 86 | 87 | 88 | 89 | 90 | 91  | 92 | 93 | 94 | 95 | 96 | 97 | 98 | 99 | 100 | 101 | 102 | 103 | 104 | 105 | 106 | 107 | 108 | 109 | 110 | 111 | 112 | 113 | 114 | 115 | 116 | 117 | 118 | 119 | 120 | 121 | 122 | 123 | 124 | 125 | 126 | 127 | 128 | 129 | 130 | 131 | 132 | 133 | 134 | 135 | 136 | 137 | 138 | 139 | 140 | 141 | 142 | 143 | 144 | 145 | 146 | 147 | 148 | 149 | 150 | 151 | 152 | 153 | 154 | 155 | 156 | 157 | 158 | 159 | 160 | 161 | 162 | 163 | 164 | 165 | 166 | 167 | 168 | 169 | 170 | 171 | 172 | 173 | 174 | 175 | 176 | 177 | 178 | 179 | 180 | 181 | 182 | 183 | 184 | 185 | 186 | 187 | 188 | 189 | 190 | 191 | 192 | 193 | 194 | 195 | 196 | 197 | 198 | 199 | 200 |
| purF1_translation                                                                  | M  | A | V | G | I | N | S | K | N | A  | S  | T  | A  | Y  | A  | F  | A  | Q  | H  | R  | G  | O  | E  | A  | S  | G  | I  | S  | N  | G  | N  | I  | K  | T  | K  | A  | G  | E  | V  | S  | L  | F  | N  | P  | D  | N  | L  | K  | T  | L  | E  | G  | E  | I  | A  | G  | H  | N  | R  | Y  | S  | T  | A  | G  | N  | S  | S  | I  | N  | D  | A  | O  | P  | L  | A  | A  | S  | -  | V  | L  | G  | D  | -  | A  | A  | H  | N  | G  | N  | L  | V   | N  | K  | E  | E  | V  | R  | S  | R  | L   | I   | D   | G   | A   | F   | Q   | T   | N   | M   | T   | E   | N   | V   | H   | L   | I   | A   | R   | S   | K   | O   | E   | S   | L   | K   | D   | R   | F   | T   | E   | S   | L   | K   | E   | C   | I   | G   | A   | F   | V   | L   | A   | S   | K   | D   | K   | L   | V   | R   | D   | P   | H   | G   | V   | R   | P   | L   | S   | G   | L   | K   | D   | G   | G   | Y   | V   | A   | S   | E   | T   | C   | A   | F   |     |     |     |     |     |     |     |     |     |     |     |     |     |     |     |     |     |     |     |     |     |     |     |     |     |     |     |
| purF2_translation                                                                  | M  | A | V | G | I | N | S | K | N | A  | S  | T  | A  | Y  | A  | F  | A  | Q  | H  | R  | G  | O  | E  | A  | S  | G  | I  | S  | N  | G  | N  | I  | K  | T  | K  | A  | G  | E  | V  | S  | L  | F  | N  | P  | D  | N  | L  | K  | T  | L  | E  | G  | E  | I  | A  | G  | H  | N  | R  | Y  | S  | T  | A  | G  | N  | S  | S  | I  | N  | D  | A  | O  | P  | L  | A  | A  | S  | -  | V  | L  | G  | D  | -  | A  | A  | H  | N  | G  | N  | L  | V   | N  | K  | E  | E  | V  | R  | S  | R  | L   | I   | D   | G   | A   | F   | Q   | T   | N   | M   | T   | E   | N   | V   | H   | L   | I   | A   | R   | S   | K   | O   | E   | S   | L   | K   | D   | R   | F   | T   | E   | S   | L   | K   | E   | C   | I   | G   | A   | F   | V   | L   | A   | S   | K   | D   | K   | L   | V   | R   | D   | P   | H   | G   | V   | R   | P   | L   | S   | G   | L   | K   | D   | G   | G   | Y   | V   | A   | S   | E   | T   | C   | A   | F   |     |     |     |     |     |     |     |     |     |     |     |     |     |     |     |     |     |     |     |     |     |     |     |     |     |     |     |
| purF3_translation                                                                  | M  | A | V | G | I | N | S | K | N | A  | S  | T  | A  | Y  | A  | F  | A  | Q  | H  | R  | G  | O  | E  | A  | S  | G  | I  | S  | N  | G  | N  | I  | K  | T  | K  | A  | G  | E  | V  | S  | L  | F  | N  | P  | D  | N  | L  | K  | T  | L  | E  | G  | E  | I  | A  | G  | H  | N  | R  | Y  | S  | T  | A  | G  | N  | S  | S  | I  | N  | D  | A  | O  | P  | L  | A  | A  | S  | -  | V  | L  | G  | D  | -  | A  | A  | H  | N  | G  | N  | L  | V   | N  | K  | E  | E  | V  | R  | S  | R  | L   | I   | D   | G   | A   | F   | Q   | T   | N   | M   | T   | E   | N   | V   | H   | L   | I   | A   | R   | S   | K   | O   | E   | S   | L   | K   | D   | R   | F   | T   | E   | S   | L   | K   | E   | C   | I   | G   | A   | F   | V   | L   | A   | S   | K   | D   | K   | L   | V   | R   | D   | P   | H   | G   | V   | R   | P   | L   | S   | G   | L   | K   | D   | G   | G   | Y   | V   | A   | S   | E   | T   | C   | A   | F   |     |     |     |     |     |     |     |     |     |     |     |     |     |     |     |     |     |     |     |     |     |     |     |     |     |     |     |
| purF4_translation                                                                  | M  | A | V | G | I | N | S | K | N | A  | S  | T  | A  | Y  | A  | F  | A  | Q  | H  | R  | G  | O  | E  | A  | S  | G  | I  | S  | N  | G  | N  | I  | K  | T  | K  | A  | G  | E  | V  | S  | L  | F  | N  | P  | D  | N  | L  | K  | T  | L  | E  | G  | E  | I  | A  | G  | H  | N  | R  | Y  | S  | T  | A  | G  | N  | S  | S  | I  | N  | D  | A  | O  | P  | L  | A  | A  | S  | -  | V  | L  | G  | D  | -  | A  | A  | H  | N  | G  | N  | L  | V   | N  | K  | E  | E  | V  | R  | S  | R  | L   | I   | D   | G   | A   | F   | Q   | T   | N   | M   | T   | E   | N   | V   | H   | L   | I   | A   | R   | S   | K   | O   | E   | S   | L   | K   | D   | R   | F   | T   | E   | S   | L   | K   | E   | C   | I   | G   | A   | F   | V   | L   | A   | S   | K   | D   | K   | L   | V   | R   | D   | P   | H   | G   | V   | R   | P   | L   | S   | G   | L   | K   | D   | G   | G   | Y   | V   | A   | S   | E   | T   | C   | A   | F   |     |     |     |     |     |     |     |     |     |     |     |     |     |     |     |     |     |     |     |     |     |     |     |     |     |     |     |
| purF5_translation                                                                  | M  | A | V | G | I | N | S | K | N | A  | S  | T  | A  | Y  | A  | F  | A  | Q  | H  | R  | G  | O  | E  | A  | S  | G  | I  | S  | N  | G  | N  | I  | K  | T  | K  | A  | G  | E  | V  | S  | L  | F  | N  | P  | D  | N  | L  | K  | T  | L  | E  | G  | E  | I  | A  | G  | H  | N  | R  | Y  | S  | T  | A  | G  | N  | S  | S  | I  | N  | D  | A  | O  | P  | L  | A  | A  | S  | -  | V  | L  | G  | D  | -  | A  | A  | H  | N  | G  | N  | L  | V   | N  | K  | E  | E  | V  | R  | S  | R  | L   | I   | D   | G   | A   | F   | Q   | T   | N   | M   | T   | E   | N   | V   | H   | L   | I   | A   | R   | S   | K   | O   | E   | S   | L   | K   | D   | R   | F   | T   | E   | S   | L   | K   | E   | C   | I   | G   | A   | F   | V   | L   | A   | S   | K   | D   | K   | L   | V   | R   | D   | P   | H   | G   | V   | R   | P   | L   | S   | G   | L   | K   | D   | G   | G   | Y   | V   | A   | S   | E   | T   | C   | A   | F   |     |     |     |     |     |     |     |     |     |     |     |     |     |     |     |     |     |     |     |     |     |     |     |     |     |     |     |
| purF6_translation                                                                  | M  | A | V | G | I | N | S | K | N | A  | S  | T  | A  | Y  | A  | F  | A  | Q  | H  | R  | G  | O  | E  | A  | S  | G  | I  | S  | N  | G  | N  | I  | K  | T  | K  | A  | G  | E  | V  | S  | L  | F  | N  | P  | D  | N  | L  | K  | T  | L  | E  | G  | E  | I  | A  | G  | H  | N  | R  | Y  | S  | T  | A  | G  | N  | S  | S  | I  | N  | D  | A  | O  | P  | L  | A  | A  | S  | -  | V  | L  | G  | D  | -  | A  | A  | H  | N  | G  | N  | L  | V   | N  | K  | E  | E  | V  | R  | S  | R  | L   | I   | D   | G   | A   | F   | Q   | T   | N   | M   | T   | E   | N   | V   | H   | L   | I   | A   | R   | S   | K   | O   | E   | S   | L   | K   | D   | R   | F   | T   | E   | S   | L   | K   | E   | C   | I   | G   | A   | F   | V   | L   | A   | S   | K   | D   | K   | L   | V   | R   | D   | P   | H   | G   | V   | R   | P   | L   | S   | G   | L   | K   | D   | G   | G   | Y   | V   | A   | S   | E   | T   | C   | A   | F   |     |     |     |     |     |     |     |     |     |     |     |     |     |     |     |     |     |     |     |     |     |     |     |     |     |     |     |
| purF7_translation                                                                  | M  | A | V | G | I | N | S | K | N | A  | S  | T  | A  | Y  | A  | F  | A  | Q  | H  | R  | G  | O  | E  | A  | S  | G  | I  | S  | N  | G  | N  | I  | K  | T  | K  | A  | G  | E  | V  | S  | L  | F  | N  | P  | D  | N  | L  | K  | T  | L  | E  | G  | E  | I  | A  | G  | H  | N  | R  | Y  | S  | T  | A  | G  | N  | S  | S  | I  | N  | D  | A  | O  | P  | L  | A  | A  | S  | -  | V  | L  | G  | D  | -  | A  | A  | H  | N  | G  | N  | L  | V   | N  | K  | E  | E  | V  | R  | S  | R  | L   | I   | D   | G   | A   | F   | Q   | T   | N   | M   | T   | E   | N   | V   | H   | L   | I   | A   | R   | S   | K   | O   | E   | S   | L   | K   | D   | R   | F   | T   | E   | S   | L   | K   | E   | C   | I   | G   | A   | F   | V   | L   | A   | S   | K   | D   | K   | L   | V   | R   | D   | P   | H   | G   | V   | R   | P   | L   | S   | G   | L   | K   | D   | G   | G   | Y   | V   | A   | S   | E   | T   | C   | A   | F   |     |     |     |     |     |     |     |     |     |     |     |     |     |     |     |     |     |     |     |     |     |     |     |     |     |     |     |
| purF8_translation                                                                  | M  | A | V | G | I | N | S | K | N | A  | S  | T  | A  | Y  | A  | F  | A  | Q  | H  | R  | G  | O  | E  | A  | S  | G  | I  | S  | N  | G  | N  | I  | K  | T  | K  | A  | G  | E  | V  | S  | L  | F  | N  | P  | D  | N  | L  | K  | T  | L  | E  | G  | E  | I  | A  | G  | H  | N  | R  | Y  | S  | T  | A  | G  | N  | S  | S  | I  | N  | D  | A  | O  | P  | L  | A  | A  | S  | -  | V  | L  | G  | D  | -  | A  | A  | H  | N  | G  | N  | L  | V   | N  | K  | E  | E  | V  | R  | S  | R  | L   | I   | D   | G   | A   | F   | Q   | T   | N   | M   | T   | E   | N   | V   | H   | L   | I   | A   | R   | S   | K   | O   | E   | S   | L   | K   | D   | R   | F   | T   | E   | S   | L   | K   | E   | C   | I   | G   | A   | F   | V   | L   | A   | S   | K   | D   | K   | L   | V   | R   | D   | P   | H   | G   | V   | R   | P   | L   | S   | G   | L   | K   | D   | G   | G   | Y   | V   | A   | S   | E   | T   | C   | A   | F   |     |     |     |     |     |     |     |     |     |     |     |     |     |     |     |     |     |     |     |     |     |     |     |     |     |     |     |
| purF9_translation                                                                  | M  | A | V | G | I | N | S | K | N | A  | S  | T  | A  | Y  | A  | F  | A  | Q  | H  | R  | G  | O  | E  | A  | S  | G  | I  | S  | N  | G  | N  | I  | K  | T  | K  | A  | G  | E  | V  | S  | L  | F  | N  | P  | D  | N  | L  | K  | T  | L  | E  | G  | E  | I  | A  | G  | H  | N  | R  | Y  | S  | T  | A  | G  | N  | S  | S  | I  | N  | D  | A  | O  | P  | L  | A  | A  | S  | -  | V  | L  | G  | D  | -  | A  | A  | H  | N  | G  | N  | L  | V   | N  | K  | E  | E  | V  | R  | S  | R  | L   | I   | D   | G   | A   | F   | Q   | T   | N   | M   | T   | E   | N   | V   | H   | L   | I   | A   | R   | S   | K   | O   | E   | S   | L   | K   | D   | R   | F   | T   | E   | S   | L   | K   | E   | C   | I   | G   | A   | F   | V   | L   | A   | S   | K   | D   | K   | L   | V   | R   | D   | P   | H   | G   | V   | R   | P   | L   | S   | G   | L   | K   | D   | G   | G   | Y   | V   | A   | S   | E   | T   | C   | A   | F   |     |     |     |     |     |     |     |     |     |     |     |     |     |     |     |     |     |     |     |     |     |     |     |     |     |     |     |
| purF10_translation                                                                 | M  | A | V | G | I | N | S | K | N | A  | S  | T  | A  | Y  | A  | F  | A  | Q  | H  | R  | G  | O  | E  | A  | S  | G  | I  | S  | N  | G  | N  | I  | K  | T  | K  | A  | G  | E  | V  | S  | L  | F  | N  | P  | D  | N  | L  | K  | T  | L  | E  | G  | E  | I  | A  | G  | H  | N  | R  | Y  | S  | T  | A  | G  | N  | S  | S  | I  | N  | D  | A  | O  | P  | L  | A  | A  | S  | -  | V  | L  | G  | D  | -  | A  | A  | H  | N  | G  | N  | L  | V   | N  | K  | E  | E  | V  | R  | S  | R  | L   | I   | D   | G   | A   | F   | Q   | T   | N   | M   | T   | E   | N   | V   | H   | L   | I   | A   | R   | S   | K   | O   | E   | S   | L   | K   | D   | R   | F   | T   | E   | S   | L   | K   | E   | C   | I   | G   | A   | F   | V   | L   | A   | S   | K   | D   | K   | L   | V   | R   | D   | P   | H   | G   | V   | R   | P   | L   | S   | G   | L   | K   | D   | G   | G   | Y   | V   | A   | S   | E   | T   | C   | A   | F   |     |     |     |     |     |     |     |     |     |     |     |     |     |     |     |     |     |     |     |     |     |     |     |     |     |     |     |
| purF11_translation                                                                 | M  | A | V | G | I | N | S | K | N | A  | S  | T  | A  | Y  | A  | F  | A  | Q  | H  | R  | G  | O  | E  | A  | S  | G  | I  | S  | N  | G  | N  | I  | K  | T  | K  | A  | G  | E  | V  | S  | L  | F  | N  | P  | D  | N  | L  | K  | T  | L  | E  | G  | E  | I  | A  | G  | H  | N  | R  | Y  | S  | T  | A  | G  | N  | S  | S  | I  | N  | D  | A  | O  | P  | L  | A  | A  | S  | -  | V  | L  | G  | D  | -  | A  | A  | H  | N  | G  | N  | L  | V   | N  | K  | E  | E  | V  | R  | S  | R  | L   | I   | D   | G   | A   | F   | Q   | T   | N   | M   | T   | E   | N   | V   | H   | L   | I   | A   | R   | S   | K   | O   | E   | S   | L   | K   | D   | R   | F   | T   | E   | S   | L   | K   | E   | C   | I   | G   | A   | F   | V   | L   | A   | S   | K   | D   | K   | L   | V   | R   | D   | P   | H   | G   | V   | R   | P   | L   | S   | G   | L   | K   | D   | G   | G   | Y   | V   | A   | S   | E   | T   | C   | A   | F   |     |     |     |     |     |     |     |     |     |     |     |     |     |     |     |     |     |     |     |     |     |     |     |     |     |     |     |
| purF12_translation                                                                 | M  | A | V | G | I | N | S | K | N | A  | S  | T  | A  | Y  | A  | F  | A  | Q  | H  | R  | G  | O  | E  | A  | S  | G  | I  | S  | N  | G  | N  | I  | K  | T  | K  | A  | G  | E  | V  | S  | L  | F  | N  | P  | D  | N  | L  | K  | T  | L  | E  | G  | E  | I  | A  | G  | H  | N  | R  | Y  | S  | T  | A  | G  | N  | S  | S  | I  | N  | D  | A  | O  | P  | L  | A  | A  | S  | -  | V  | L  | G  | D  | -  | A  | A  | H  | N  | G  | N  | L  | V   | N  | K  | E  | E  | V  | R  | S  | R  | L   | I   | D   | G   | A   | F   | Q   | T   | N   | M   | T   | E   | N   | V   | H   | L   | I   | A   | R   | S   | K   | O   | E   | S   | L   | K   | D   | R   | F   | T   | E   | S   | L   | K   | E   | C   | I   | G   | A   | F   | V   | L   | A   | S   | K   | D   | K   | L   | V   | R   | D   | P   | H   | G   | V   | R   | P   | L   | S   | G   | L   | K   | D   | G   | G   | Y   | V   | A   | S   | E   | T   | C</ |     |     |     |     |     |     |     |     |     |     |     |     |     |     |     |     |     |     |     |     |     |     |     |     |     |     |     |     |     |
